# Supplementary material
Source: MDPI journal article supplement (https://www.mdpi.com/2071-1050/12/14/5565)
Supplement: s1 [file s1]

## Supplementary material

# **Life Cycle Sustainability Assessment of Alternative Energy Sources for the Western Australian transport sector**

Najmul Hoque <sup>1</sup>, Wahidul Biswas <sup>2\*</sup>, Ilyas Mazhar <sup>1</sup> and Ian Howard <sup>1</sup>

<sup>1</sup> School of Civil and Mechanical Engineering, Curtin University, Perth, WA 6102, Australia

<sup>2</sup> Sustainability Engineering Group, Curtin University, Perth, WA 6102, Australia

\* Correspondence: [W.Biswas@curtin.edu.au](mailto:W.Biswas@curtin.edu.au)

## Section A: Fuel Selection

The reasons for selecting ethanol, electricity and hydrogen fuel for WA are summarized in this section. The section also describes the reasons for not selecting biogas, natural gas and LPG as a transport fuel for the state.

### 1. Ethanol

As mentioned in the manuscript, the gasoline-ethanol blend E65 is considered as the base case for the study. Three potential feedstocks, such as wheat (E10), cereal straw (E53) and Mallee (E2) are used to produce E65 due to their availability in WA.

Wheat: WA produces around 10 million tonnes of wheat every year and 95% of this is exported [1]. Whereas, only 0.57 million tonnes of wheat is required for producing the E10 to meet the state requirements (Eq. 1 and 2) without affecting the food supply chain [2]. Around 6.6% of total gasoline requirement in WA can be replaced with this E10 (Eq. 3).

$$\text{Amount of ethanol} = \text{Ethanol conversion rate} \times \text{Amount of feedstock} \quad (1)$$

Possible ethanol blend in WA=

$$(\text{Amount of ethanol} \div \text{Gasoline requirement of WA}) \times 100 \quad (2)$$

$$\text{Percentage of gasoline replacement in WA} = \text{Ethanol blend} \div \text{ratio of calorific value of gasoline to calorific value of ethanol} \quad (3)$$

Where, Amount of feedstock = 0.57 M tonnes, ethanol conversion rate from wheat = 400 L/tonne [3], gasoline requirement of WA = 2262 ML [4], ratio of calorific value of gasoline to calorific value of ethanol = 1.51 [5].

### Cereal straw:

Around 5.157 million tonnes of straw is available in WA for ethanol production [2]. The amount of ethanol blend E53 is calculated using the Eq. 1, 2 and 3 as below:

$$\text{Ethanol blend} = (5.157 \times 231.48 \div 2262) \times 100 \approx \text{E53}, \text{ which is equivalent to 35\% gasoline replacement in WA.}$$

Where, ethanol conversion rate from straw = 231.48 Litre/tonne based on the 25% moisture content of straw [2, 6].

### Mallee:

Around 0.259 million tonnes of Mallee resources are currently available in WA [2, 7] that could generate 1.3% (E 2) of gasoline replacement in WA [2] (based on Eq. 1, 2 and 3).

Amount of ethanol=  $259 \div 5.80 = 45$  ML

Ethanol blend from Mallee =  $(45 \div 2262) \times 100 \approx E2$ , which is equivalent to 1.3% gasoline replacement in WA.

Where, Ethanol conversion rate from Mallee= 5.80 kg/L [2, 6]

Corn, grain sorghum and sugarcane are the other three popular sources of ethanol in the World but the production of those feedstocks in WA is not viable due to the unfavourable climatic conditions [8]. The feedstocks that are produced in the other parts of Australia [9] are not sufficient to bring into WA for ethanol production. Forrest residues, on the other hand, are not considered in this study for ethanol production due to the highly distributed nature of the feedstocks making their collection time consuming and expensive [10, 11].

## **2. Electricity**

Electricity generation mix in WA is comparatively cleaner than the other states of Australia as it comprises 53% natural gas-based and around 7.1% renewable energy-based (mainly solar and wind) electricity. Whereas, the amounts of electricity produced from coal in Victoria, NSW and QLD are 85%, 82% and 65% respectively. The future energy policy of WA also supports the initiatives of electric cars as penetration of more renewable energy in WA's grid is inline as per the policy of the Western Australian Government [12, 13]. It has been estimated that around 37% of electricity would be produced from renewable energy by 2030 in WA. It has been noted that the current electricity grid in WA has a significant amount of surplus that is sufficient to fulfil the fuel needs of as many as 200,000 electric vehicles. This accounts for 10% of all vehicles in WA. A subsidized EV home charging electricity plan during off-peak hours is already available in WA [14]. There are also around 63 charging facilities in different parts of WA [15]. Due to the current potential of EV and PHEV in WA and their increasing use in Australia, they are included in the assessment.

## **3. Hydrogen**

The Western Australian government announced the renewable hydrogen strategy in July 2019 emphasising the need for hydrogen production through WA's renewable wind and solar energy potentials [16]. Excellent wind and solar potential, and skilled workforce are considered as advantages of WA compared to other regions. According to the policy [16]:

- WA government will devise hydrogen regulations, and will support renewable hydrogen production through private sectors,
- Hydrogen refuelling stations for vehicles will be available in WA by 2022,
- Hydrogen will be the significant fuel source for the WA transport sector by 2040.

Hydrogen production through renewable electricity requires water as a feedstock. It has been calculated that only 0.22% of all physical water consumption of WA would be utilized to produce all the hydrogen needed for the state to replace gasoline [2].

#### **4. Biogas**

Sewage sludge, animal manure and municipal wastes are the three potential feedstocks for biogas in WA [2, 17, 18]. As these feedstocks are dispersedly located in WA, it would require long-distance transport to carry these feedstocks to chemical plants for biogas production [2, 17]. Electricity production by using biogas seems more feasible from these scattered sources [2, 17].

#### **5. Natural gas and LPG**

Natural gas and LPG are also not considered for this study due to the following reasons:

- Sixty-nine percent of Australian natural gas is produced in WA. It has been estimated that the state could run another 97 years from now with its gas reserve. However, proven and probable commercial gas reserves of WA may run out very quickly by 2045 (25 years from now) if they continue utilizing the gas in the same manner as at present [19].
- WA is already in a long-term contract with several companies to export LNG, and 97% of WA's conventional gas reserve is held by the LNG export companies and their joint ventures [20].
- WA government has set a policy to supply only 15% natural gas (of equivalent LNG production) to the WA domestic market. Ninety eight percent (98%) of this gas is used for electricity production, industrial purpose, mining and domestic purposes. Remaining 2% is used for other commercial purposes [19]. Additional around 84 PJ\* of natural gas will be required to replace all gasoline in WA. The remaining amount of gas which is available in the domestic market is not sufficient to meet the needs of the transport sector [19]. Besides, to save the WA gas for electricity generation for household and industrial applications seem to be better options than its use for the transport sector. Studies suggest that using natural gas and LPG in vehicles is not the proper way to tackle the energy security and climate change problems [21]. It has been found that CNG vehicles produce more GHG emissions than the coal-fired electricity and oil furnace due to the low-efficiency of gasoline engines [22].

\*The gasoline requirement of WA = 2262 ML/year  $\approx$  2262 M m<sup>3</sup> natural gas/year

= 2.262 billion m<sup>3</sup>/year = (2.262/0.027) PJ/year = 83.78 PJ/year

Where, 1 L of gasoline is equivalent to 1 m<sup>3</sup> of CNG [23] and 1 PJ = 0.027 billion cubic meters of natural gas [19]

- Unlike natural gas, only a small portion of LPG is produced in WA. In 2016-17, there were only around 800 ML of LPG (both butane and propane) produced in WA [20]. It has been estimated that around 2714.4 ML\*\* of LPG is required to replace all the gasoline requirements of WA. So, the current LPG production in WA is not enough to replace all the gasoline in the WA transport sector. LPG is also used for household and industrial applications in WA. It has also been found that overall LPG production in WA is reduced

to about 53% compared to 2010 level, and the current production is the lowest ever in the history of WA since 1999 [20].

- Overall, the current Australian strategic LPG reserve is only for 59 days [24].

\*\*The calculation procedure of 2714.4 ML of LPG requirement to replace all gasoline requirement of WA:

1 Litre gasoline provides mileage equivalent to 1.2 L of LPG [23].

The gasoline requirement of WA= 2262 ML/year

So, LPG requirement = 2262\*1.2 = 2714.4 ML / year

## Section B: Governing equation of indicators

### Environmental indicators:

$$GWP/VKT = \sum_{i=1}^N (EF_{iCO_2} \times I_i + 28EF_{iCH_4} \times I_i + 265EF_{iN_2O} \times I_i) \quad (4)$$

$$WC/VKT = \sum_{i=1}^N (WC_i \times I_i) \quad (5)$$

$$FFD/VKT = \sum_{i=1}^N (FFD_i \times I_i) \quad (6)$$

$$LU/VKT = \sum_{i=1}^N (LU_i \times I_i \times TO_i) \quad (7)$$

Where,  $GWP$  = global warming potential in  $kgCO_2$ ,  $VKT$  = vehicle kilometer travelled,  $i$  = life cycle inventory input (1, 2, 3 ...  $N$ ) per VKT,  $I$  = amount of input,  $EF_{iCO_2}$  =  $CO_2$  emission in kg for an input  $i$ ,  $EF_{iCH_4}$  =  $CH_4$  emission in kg for an input  $i$ ,  $EF_{iN_2O}$  =  $N_2O$  emission in kg for an input  $i$ ,  $WC$  = water consumption in  $m^3$ ,  $WC_i$  = water consumption for an input  $i$  in  $m^3$ ,  $FFD$  = fossil fuel depletion potential in MJ,  $FFD_i$  = consumption of fossil fuel for input  $i$  in MJ,  $LU$  = land use in Ha.a,  $LU_i$  = land use for an input  $i$  in ha,  $TO_i$  = exclusive time of land occupation by input  $i$  in years.

### Social indicators:

$$Local\ Job\ creations/VKT = \sum_{i=1}^N (mh_i \times I_i) + mh_p + mh_{va} \quad (8)$$

Where,  $i$  = life cycle inventory input (1, 2, 3 ...  $N$ ) which comes from local WA per VKT,  $mh_i$  = man-hours required for input  $i$ ,  $I$  = amount of input,  $mh_p$  = man-hours required at the alternative fuel production plant to produce 1 km equivalent alternative fuel,  $mh_{va}$  = man-hours required at the vehicle assembly plant to assemble 1 km equivalent alternative vehicle.

$$Job\ creation\ through\ electricity = I_c \times J_f \times M \quad (9)$$

Where,  $I_c$  = Installed capacity,  $J_f$  = employment factor estimated from Rutovitz et al. [25] and  $M$  = multiplier (1 for OECD pacific countries such as Australia for this instance).

$$CFF/VKT = FFD_{af} - FFD_{gasoline} \quad (10)$$

Where,  $CFF$  = Conservation of fossil fuel in MJ,  $FFD_{af}$  = Fossil fuel use of alternative fuel per VKT in MJ,  $FFD_{gasoline}$  = Fossil fuel use of gasoline per VKT in MJ.

#### Economic indicators:

$$PV = \sum_{i=1}^{i=n} \frac{C \times (1 + IR)^i}{(1 + DR)^i} \quad (11)$$

$$AC = PV \times CRF \quad (12)$$

$$CRF = \frac{(1 + x)^n}{(1 + x)^n - 1} \quad (13)$$

$$LCC/VKT = (AC \div AF) \times FC + AV_{af} \quad (14)$$

Where,  $i = 1, 2, 3 \dots n$ ; year value till end of life of the project,  $C$  = Present cost (AUD),  $IR$  = Inflation rate (3%) and  $DR$  = Discount rate (7%) [26],  $AC$  = Annualized cost,  $x$  = Real discount rate of 3.88% calculated from  $IR$  and  $DR$  [27],  $AF$  = Per unit fuel production annually,  $FC$  = Fuel consumption per km,  $AV_{af}$  = Additional vehicle cost per km for an alternative fuel compared to gasoline.

$$CRC/VKT = (GHG_{gasoline} - GHG_{af}) * CP \quad (15)$$

Where,  $CRC$  = carbon reduction credit per VKT in AUD,  $GHG_{gasoline}$  = life cycle GHG emission (kgCO<sub>2e</sub>) per VKT from gasoline,  $GHG_{af}$  = life cycle GHG emission (kgCO<sub>2</sub>) from alternative fuel per VKT,  $CP$  = Carbon price for per kg GHG emission in AUD.

### **Section C: Data summary for job creation and economic indicators**

**Table S1:** Job creation through different activities in Mallee plantation and grain farming (by farmers and contractors)

| Activities                                            | unit   | Job creation<br>(Job-hrs) | remarks                          |
|-------------------------------------------------------|--------|---------------------------|----------------------------------|
| <b>1. Mallee plantation establishment and harvest</b> |        |                           |                                  |
| Initial planning of advisor                           | 1 gmt* | 2.22E-04                  | Based on Wu et al [28]           |
| Site inspection by advisor                            | 1 gmt  | 2.22E-04                  | Same as above                    |
| Site supervision by advisor                           | 1 gmt  | 2.22E-04                  | Same as above                    |
| Contract marking out and mapping                      | 1 gmt  | 6.67E-04                  | Same as above                    |
| earthworks by farmer                                  | 1 gmt  | 1.11E-03                  | Same as above                    |
| weed control                                          | 1 gmt  | 1.11E-04                  | Same as above                    |
| monitoring of Mallee seedling production at nursery   | 1 gmt  | 2.22E-04                  | Same as above                    |
| transport of seedlings from nursery to site           | 1 gmt  | 2.78E-04                  | Same as above                    |
| Planting                                              | 1 gmt  | 1.56E-02                  | Same as above                    |
| monitoring of newly planted seedling                  | 1 gmt  | 6.67E-04                  | Same as above                    |
| spring weed control                                   | 1 gmt  | 1.11E-04                  | Same as above                    |
| Pesticide                                             | 1 gmt  | 1.11E-04                  | Same as above                    |
| 2 <sup>nd</sup> year weed control                     | 1 gmt  | 1.11E-04                  | Same as above                    |
| Mallee harvest                                        | 1 gmt  | 1.67E-02                  | Based on Weldegiorgis et al [29] |

|                           |             |          |                                                 |
|---------------------------|-------------|----------|-------------------------------------------------|
| <b>2. grain farming</b>   |             |          |                                                 |
| Planting                  | 1 L ethanol | 1.58E-04 | Based on 0.12 hours/ha [30]                     |
| Spraying                  | 1 L ethanol | 3.95E-04 | Based on 0.03 hours/ha [30]                     |
| Harvesting                | 1 L ethanol | 1.05E-04 | Based on 0.08 hours/ha [30]                     |
| Top dressing              | 1 L ethanol | 1.58E-04 | Based on 0.12 hour/ha [31]                      |
| <b>3. Others</b>          |             |          |                                                 |
| Straw harvest             | 1 L ethnaol | 4.97E-05 | 27% additional time than grain harvest [32]     |
| Straw baling and handling | 1 l ethanol | 1.84E-04 | Assumption based on based on Stucley et al [32] |

\*green metric tonne of Mallee

**Table S2:** Data summary for LCC

| input                                     | category       | unit          | Cost (AUD) | Remarks                                                                |
|-------------------------------------------|----------------|---------------|------------|------------------------------------------------------------------------|
| <b>1. Cost of different inputs</b>        |                |               |            |                                                                        |
| Flexi N                                   | fertilizer     | kg            | 4.50E-01   | Based on local suppliers                                               |
| Urea                                      | fertilizer     | kg            | 5.30E-01   | Same as above                                                          |
| DAP                                       | fertilizer     | kg            | 5.60E-01   | Same as above                                                          |
| Lime                                      | chemical       | tonne         | 1.00E+01   | Based on department of Agriculture, WA                                 |
| Glyphosate                                | Herbicide      | L             | 8.00E+00   | Weed control in winter crops 2018 [33]                                 |
| Crusader                                  | Herbicide      | L             | 7.92E+01   | Lupin Agronomy, WA; Elders Technical Site Results. [34]                |
| Gramoxone                                 | Herbicide      | L             | 9.49E+00   | Weed control in winter crops 2018 [33]                                 |
| Logran                                    | Herbicide      | kg            | 2.17E+02   | Same as above                                                          |
| MCPA 242                                  | Herbicide      | L             | 1.09E+01   | Same as above                                                          |
| Treflan                                   | Herbicide      | L             | 10.00E+00  | Lupin Agronomy, WA; Elders Technical Site Results. [34]                |
| Chlorpyrifos                              | pesticide      | L             | 1.50E+01   | Based on local suppliers                                               |
| Simazine                                  | herbicide      | kg            | 7.94E+00   | Weed control in winter crops 2018 [33]                                 |
| Lontrel                                   | herbicide      | L             | 4.21E+01   | Same as above                                                          |
| Eclipse                                   | herbicide      | L             | 2.02E+02   | Same as above                                                          |
| Verdict                                   | herbicide      | L             | 4.91E+01   | Same as above                                                          |
| Sulfuric Acid                             | chemical       | kg            | 6.90E-01   | Based on local suppliers                                               |
| NaOH                                      | chemical       | kg            | 6.50E-01   | Efficient costs of new entrant ethanol producers, AECOM Australia. [9] |
| Canola oil                                | -              | kg            | 1.84E+00   | Based on local suppliers                                               |
| Corn steep liquor                         | chemical       | kg            | 3.00E-01   | Same as above                                                          |
| Diesel                                    | fuel           | L             | 1.48E+00   | Fuel Watch WA [35]                                                     |
| Ethanol delivery to tanker station        | transportation | tkm           | 6.90E-02   | Based on AECOM Australia. [9]                                          |
| <b>2. Activities during grain framing</b> |                |               |            |                                                                        |
| Seeding                                   | Contractor job | 1 tonne grain | 2.10E+01   | Department of Primary Industries and Regional Development, WA[31]      |
| Spraying                                  | Contractor job | 1 tonne grain | 8.83E+00   | Same as above                                                          |
| Harvesting                                | Contractor job | 1 tonne grain | 1.75E+01   | Same as above                                                          |
| Top dressing                              | Contractor job | 1 tonne grain | 2.10E+01   | Same as above                                                          |
| Salaries                                  | Contractor job | 1 tonne grain | 3.40E+00   | Same as above                                                          |

|                                                     |                |               |          |                             |
|-----------------------------------------------------|----------------|---------------|----------|-----------------------------|
| Plant and equipment                                 | Contractor job | 1 tonne grain | 2.80E+00 | Same as above               |
| <b>3. Mallee Plantation Establishment</b>           |                |               |          |                             |
| Initial planning of advisor                         | Contractor job | gmt**         | 1.59E-02 | Based on Wu et al [28]      |
| Site inspection by advisor                          | Contractor job | gmt           | 1.59E-02 | Same as above               |
| Site supervision by advisor                         | Contractor job | gmt           | 1.59E-02 | Same as above               |
| Contract marking out and mapping                    | Contractor job | gmt           | 4.77E-02 | Same as above               |
| Earthworks by farmer                                | Contractor job | gmt           | 3.31E-02 | Same as above               |
| Weed control                                        | Contractor job | gmt           | 3.31E-03 | Same as above               |
| Monitoring of Mallee seedling production at nursery | Contractor job | gmt           | 1.59E-02 | Same as above               |
| Transport of seedlings from nursery to site         | Contractor job | gmt           | 8.28E-03 | Same as above               |
| Planting                                            | Contractor job | gmt           | 4.64E-01 | Same as above               |
| Monitoring of newly planted seedling                | Contractor job | gmt           | 4.77E-02 | Same as above               |
| Spring weed control                                 | Contractor job | gmt           | 3.31E-03 | Same as above               |
| Pesticide                                           | Contractor job | gmt           | 3.31E-03 | Same as above               |
| 2 <sup>nd</sup> year weed control                   | Contractor job | gmt           | 3.31E-03 | Same as above               |
| <b>4. Mallee harvest</b>                            |                |               |          |                             |
| Harvest by farmer                                   | Contractor job | gmt           | 5.11E+00 | Based on Stucley et al [32] |
| Fertilizer after every harvest                      | Contractor job | gmt           | 2.80E-01 | Based on Wu et al [28]      |
| Supply chain management                             | wage           | gmt           | 4.35E+00 | Same as above               |
| <b>5. Others</b>                                    |                |               |          |                             |
| Land opportunity cost for Mallee plantation         | -              | gmt           | 2.18E+01 | Based on Stucley et al [32] |

\* All costs are in AUD 2018

### Section D: Sample calculations for improvement strategies

#### 1. Environmental strategy for hydrogen fuel

- Strategy: Renewable electricity (50% wind and 50% solar) for hydrogen production

| Item                                         | Base case                   |                         |              |             | After implementing strategies |                         |              |             | Reduction from base case                                                                                                          |
|----------------------------------------------|-----------------------------|-------------------------|--------------|-------------|-------------------------------|-------------------------|--------------|-------------|-----------------------------------------------------------------------------------------------------------------------------------|
|                                              | GWP<br>(kgCO <sub>2</sub> ) | WC<br>(m <sup>3</sup> ) | LU<br>(ha.a) | FFD<br>(MJ) | GWP<br>(kgCO <sub>2</sub> )   | WC<br>(m <sup>3</sup> ) | LU<br>(ha.a) | FFD<br>(MJ) |                                                                                                                                   |
| Electricity per kWh                          | 8.75E-01                    | 1.31E-03                | 4.39E-06     | 7.90E+00    | 1.04E-03                      | 4.95E-06                | 1.07E-08     | 1.08E-02    | $D_{\text{base case}} - D_{\text{after implementing strategy}}$<br><br>GWP=4.79E-01<br>WC=7.12E-04<br>LU=2.40E-06<br>FFD=4.32E+00 |
| Hydrogen production plant impact per VKT (A) | 4.79E-01                    | 7.19E-04                | 2.41E-06     | 4.34E+00    | 5.87E-04                      | 3.16E-06                | 6.01E-09     | 6.17E-03    |                                                                                                                                   |
| Fuel life cycle (B)                          | 4.95E-01                    | 8.90E-4                 | 2.46E-06     | 4.57E+00    | 1.61E-02                      | 1.75E-04                | 5.45E-08     | 2.38E-01    |                                                                                                                                   |
| Vehicle materials (C)                        | 6.14E-02                    | 6.03E-4                 | 3.76E-07     | 7.75E-01    | 6.14E-02                      | 6.03E-04                | 3.76E-07     | 7.75E-01    |                                                                                                                                   |
| Total life cycle impact (D=B+C)              | 5.57E-01                    | 1.49E-03                | 2.83E-06     | 5.34E+00    | 7.75E-02                      | 7.78E-04                | 1.64E-07     | 1.01E+00    |                                                                                                                                   |
| Total life cycle impact of gasoline (E)      | 2.53E-01                    | 6.19E-04                | 1.90E-07     | 2.92E+00    | 2.53E-01                      | 6.19E-04                | 1.90E-07     | 2.92E+00    |                                                                                                                                   |
| Reduction compared to gasoline [(E-D)/E]     | -120%                       | -                       | -            | -83%        | 69%                           | -                       | -            | 65%         |                                                                                                                                   |

#### 2. Environmental strategy for EV

- Strategy: Cleaner grid electricity (2030 grid of WA) for EV charging

| Item                                     | Base case                   |                         |              |             | After implementing strategy |                         |              |             | Reduction from base case                                                                                                          |
|------------------------------------------|-----------------------------|-------------------------|--------------|-------------|-----------------------------|-------------------------|--------------|-------------|-----------------------------------------------------------------------------------------------------------------------------------|
|                                          | GWP<br>(kgCO <sub>2</sub> ) | WC<br>(m <sup>3</sup> ) | LU<br>(ha.a) | FFD<br>(MJ) | GWP<br>(kgCO <sub>2</sub> ) | WC<br>(m <sup>3</sup> ) | LU<br>(ha.a) | FFD<br>(MJ) |                                                                                                                                   |
| Electricity per kWh                      | 8.75E-01                    | 1.31E-03                | 4.39E-06     | 7.90E+00    | 5.18E-01                    | 1.25E-03                | 4.38E-06     | 5.88E+00    | $C_{\text{base case}} - C_{\text{after implementing strategy}}$<br><br>GWP=5.30E-02<br>WC=9.00E-06<br>LU=0.00E+00<br>FFD=3.00E-01 |
| Fuel life cycle (A)                      | 1.30E-01                    | 1.94E-04                | 6.50E-07     | 1.17E+00    | 7.67E-02                    | 1.85E-04                | 6.49E-07     | 8.71E-01    |                                                                                                                                   |
| Vehicle materials (B)                    | 5.02E-02                    | 2.95E-04                | 4.19E-07     | 5.96E-01    | 5.02E-02                    | 2.95E-04                | 4.19E-07     | 5.96E-01    |                                                                                                                                   |
| Total life cycle impact (C=A+B)          | 1.80E-01                    | 4.90E-04                | 1.07E-06     | 1.77E+00    | 1.27E-01                    | 4.80E-04                | 1.07E-06     | 1.47E+00    |                                                                                                                                   |
| Total life cycle impact of gasoline (D)  | 2.53E-01                    | 6.19E-04                | 1.90E-07     | 2.92E+00    | 2.53E-01                    | 6.19E-04                | 1.90E-07     | 2.92E+00    |                                                                                                                                   |
| Reduction compared to gasoline [(E-D)/E] | 29%                         | -                       | -            | 39%         | 50%                         | -                       | -            | 50%         |                                                                                                                                   |



### 3. Environmental strategies for PHEV:

- Strategy 1: Use of E10 (10% ethanol and 90% gasoline) in place of gasoline as fuel

| Item                                                          | Base case                   |                         |              |             | After implementing strategy |                         |              |             | Reduction from base case                                        |
|---------------------------------------------------------------|-----------------------------|-------------------------|--------------|-------------|-----------------------------|-------------------------|--------------|-------------|-----------------------------------------------------------------|
|                                                               | GWP<br>(kgCO <sub>2</sub> ) | WC<br>(m <sup>3</sup> ) | LU<br>(ha.a) | FFD<br>(MJ) | GWP<br>(kgCO <sub>2</sub> ) | WC<br>(m <sup>3</sup> ) | LU<br>(ha.a) | FFD<br>(MJ) | C base case- C after implementing strategy                      |
| Fuel (base case gasoline and E10 is the strategy) for 1 Litre | 7.25E-01                    | 7.39E-03                | 1.45E-06     | 4.46E+01    | 7.00E-01                    | 8.69E-03                | 3.98E-06     | 4.08E+01    | GWP= 8.00E-03<br>WC= -3.20E-05<br>LU= -5.70E-08<br>FFD=7.00E-02 |
| Fuel life cycle (A)                                           | 1.79E-01                    | 2.66E-04                | 3.73E-07     | 1.61E+00    | 1.71E-01                    | 2.98E-04                | 4.30E-07     | 1.53E+00    |                                                                 |
| Vehicle materials (B)                                         | 3.83E-02                    | 2.69E-04                | 2.50E-07     | 3.96E-01    | 3.83E-02                    | 2.69E-04                | 2.50E-07     | 3.96E-01    |                                                                 |
| Total life cycle impact (C=A+B)                               | 2.17E-01                    | 5.35E-04                | 6.23E-07     | 2.00E+00    | 2.09E-01                    | 5.67E-04                | 6.80E-07     | 1.93E+00    |                                                                 |
| Total life cycle impact of gasoline (D)                       | 2.53E-01                    | 6.19E-04                | 1.90E-07     | 2.92E+00    | 2.53E-01                    | 6.19E-04                | 1.90E-07     | 2.92E+00    |                                                                 |
| Reduction compared to gasoline [(D-C)/D]                      | 14.11%                      | -                       | -            | 31.36%      | 17.31%                      | -                       | -            | 34%         |                                                                 |

- Strategy 1 and 2: Use of E10 in place of gasoline as fuel +Cleaner grid electricity (2030 grid of WA as like EV) for charging

| Item                                               | Base case                   |                         |              |             | After implementing strategy |                         |              |             | Reduction from base case                                        |
|----------------------------------------------------|-----------------------------|-------------------------|--------------|-------------|-----------------------------|-------------------------|--------------|-------------|-----------------------------------------------------------------|
|                                                    | GWP<br>(kgCO <sub>2</sub> ) | WC<br>(m <sup>3</sup> ) | LU<br>(ha.a) | FFD<br>(MJ) | GWP<br>(kgCO <sub>2</sub> ) | WC<br>(m <sup>3</sup> ) | LU<br>(ha.a) | FFD<br>(MJ) | C base case- C after implementing strategy                      |
| Fuel life cycle (A)                                | 1.79E-01                    | 2.66E-04                | 3.73E-07     | 1.61E+00    | 1.40E-01                    | 2.84E-04                | 4.29E-07     | 1.37E+00    | GWP= 3.90E-02<br>WC= -1.80E-05<br>LU= -5.60E-08<br>FFD=2.30E-01 |
| Vehicle materials (B)                              | 3.83E-02                    | 2.69E-04                | 2.50E-07     | 3.96E-01    | 3.83E-02                    | 2.69E-04                | 2.50E-07     | 3.96E-01    |                                                                 |
| Total life cycle impact (C=A+B)                    | 2.17E-01                    | 5.35E-04                | 6.23E-07     | 2.00E+00    | 1.78E-01                    | 5.53E-04                | 6.79E-07     | 1.77E+00    |                                                                 |
| Total life cycle impact of gasoline (D)            | 2.53E-01                    | 6.19E-04                | 1.90E-07     | 2.92E+00    | 2.53E-01                    | 6.19E-04                | 1.90E-07     | 2.92E+00    |                                                                 |
| Reduction compared to gasoline base case [(D-C)/D] | 14.11%                      | -                       | -            | 31.36%      | 30%                         | -                       | -            | 39%         |                                                                 |

- Strategy 1, 2 and 3: Cleaner grid electricity for charging + Use of E10 in place of gasoline+ Placement of 180 W<sub>p</sub> solar PV on the vehicle

| Item                                               | Base case                   |                         |              |             | After implementing strategy |                         |              |             | Reduction from base case                                                                                                              |
|----------------------------------------------------|-----------------------------|-------------------------|--------------|-------------|-----------------------------|-------------------------|--------------|-------------|---------------------------------------------------------------------------------------------------------------------------------------|
|                                                    | GWP<br>(kgCO <sub>2</sub> ) | WC<br>(m <sup>3</sup> ) | LU<br>(ha.a) | FFD<br>(MJ) | GWP<br>(kgCO <sub>2</sub> ) | WC<br>(m <sup>3</sup> ) | LU<br>(ha.a) | FFD<br>(MJ) | $C_{\text{base case}} - C_{\text{after implementing strategy}}$<br><br>GWP= 5.20E-02<br>WC= 8.00E-06<br>LU= -5.00E-09<br>FFD=3.50E-01 |
| Fuel life cycle (A)                                | 1.79E-01                    | 2.66E-04                | 3.73E-07     | 1.61E+00    | 1.27E-01                    | 2.58E-04                | 4.17E-07     | 1.25E+00    |                                                                                                                                       |
| Vehicle materials (B)                              | 3.83E-02                    | 2.69E-04                | 2.50E-07     | 3.96E-01    | 3.83E-02                    | 2.69E-04                | 2.50E-07     | 3.96E-01    |                                                                                                                                       |
| Total life cycle impact (C=A+B)                    | 2.17E-01                    | 5.35E-04                | 6.23E-07     | 2.00E+00    | 1.65E-01                    | 5.27E-04                | 6.67E-07     | 1.61E+00    |                                                                                                                                       |
| Total life cycle impact of gasoline (D)            | 2.53E-01                    | 6.19E-04                | 1.90E-07     | 2.92E+00    | 2.53E-01                    | 6.19E-04                | 1.90E-07     | 2.92E+00    |                                                                                                                                       |
| Reduction compared to gasoline base case [(D-C)/D] | 14.11%                      | -                       | -            | 31.36%      | 34.70%                      | -                       | -            | 43.57%      |                                                                                                                                       |

#### 4. Environmental strategies for E65:

- Strategy: Ethanol blend E55 is considered in place of E65

(i) Environmental impact of different ethanol feedstocks used in the study:

| Item                     | GWP<br>(kgCO <sub>2</sub> ) | WC<br>(m <sup>3</sup> ) | LU<br>(ha.a) | FFD<br>(MJ) |
|--------------------------|-----------------------------|-------------------------|--------------|-------------|
| E <sub>Wheat</sub> , 1L  | 9.34E-01                    | 1.07E-02                | 5.29E-04     | 1.14E+01    |
| E <sub>Straw</sub> , 1 L | 4.60E-01                    | 1.60E-02                | 2.67E-05     | 5.93E+00    |
| E <sub>Mallee</sub> ,1 L | 4.65E-01                    | 1.48E-02                | 3.56E-04     | 6.16E+00    |
| Gasoline, 1 L            | 7.25E-01                    | 7.39E-03                | 1.45E-06     | 4.46E+01    |

(ii) Changes in environmental impact due to the switch from E65 to E55

| Item                                                                                                                                                                                                     | E65                         |                         |              |             | E55                         |                         |              |             |
|----------------------------------------------------------------------------------------------------------------------------------------------------------------------------------------------------------|-----------------------------|-------------------------|--------------|-------------|-----------------------------|-------------------------|--------------|-------------|
|                                                                                                                                                                                                          | GWP<br>(kgCO <sub>2</sub> ) | WC<br>(m <sup>3</sup> ) | LU<br>(ha.a) | FFD<br>(MJ) | GWP<br>(kgCO <sub>2</sub> ) | WC<br>(m <sup>3</sup> ) | LU<br>(ha.a) | FFD<br>(MJ) |
| 1 L<br>(E65 = 10% E <sub>Wheat</sub> + 53% E <sub>Straw</sub> + 2% E <sub>Mallee</sub> + 35% Gasoline)<br>(E55 = 0% E <sub>Wheat</sub> + 53% E <sub>Straw</sub> + 2% E <sub>Mallee</sub> + 35% Gasoline) | 6.00E-01                    | 1.24E-02                | 7.47E-05     | 2.00E+01    | 5.55E-01                    | 1.21E-02                | 2.20E-05     | 2.31E+01    |
| Fuel per km with combustion and transportation to retailer (E65 fuel consumption: 0.075 L/km, E55 fuel consumption: 0.072 L/km) (A)                                                                      | 1.30E-01                    | 9.36E-04                | 5.61E-06     | 1.51E+00    | 1.46E-01                    | 8.77E-04                | 1.58E-06     | 1.69E+00    |
| Vehicle materials (B)                                                                                                                                                                                    | 1.96E-02                    | 1.81E-04                | 1.09E-07     | 2.30E-01    | 1.96E-02                    | 1.81E-04                | 1.09E-07     | 2.30E-01    |
| Total (A+B)                                                                                                                                                                                              | 1.49E-01                    | 1.12E-03                | 5.72E-06     | 1.74E+00    | 1.66E-01                    | 1.06E-03                | 1.69E-06     | 1.93E+00    |

##### 5. Social strategy in regard to Job creation indicator

- Strategy: Job creation due to local battery production

Based on Boston Energy and Innovation Australia [36] and by considering standard 34.4 working hours per week for Australia [37], 1.50E+07 kWh battery production requires 3.98E+06 direct man-hours (i.e. 15 GWh/year requires 2222.2 direct employment) for Li-ion battery production.

| Fuel options | Battery size, kWh<br>(a) | Job creation, man-hours/kWh<br>(b)                                     | Total Job creation, man-hours<br>(c=a*b) | Total km of vehicle<br>[2]<br>(d) | Job creation, man-hours/km for local battery production<br>(e= c/d) |
|--------------|--------------------------|------------------------------------------------------------------------|------------------------------------------|-----------------------------------|---------------------------------------------------------------------|
| EV           | 40                       | 3.98E+06 man-hours<br>÷<br>1.50E+07 kWh<br>=<br>2.65E-01 man-hours/kWh | 1.06E+01                                 | 1.13E+05                          | 9.42E-05                                                            |
| PHEV         | 8.8                      |                                                                        | 2.33E+00                                 |                                   | 2.07E-05                                                            |
| Hydrogen     | 1.6                      |                                                                        | 4.24E-01                                 |                                   | 1.84E-10                                                            |

6. Economic strategies for E55 in regard to LCC indicator

- Strategy 1: Removal of excise rate on ethanol
- Strategy 2: Long term soft loan for the capital cost at the rate of 3% interest rate over the project life
- Strategy 3: 10% of capital (around 19 M AUD) subsidy from the government
- Strategy 3: Removal of GST on E55

| Item                                   | Before implementing strategies, AUD/VKT | After implementing strategy 1, AUD/VKT | After implementing strategies 1 and 2, AUD/VKT | After implementing strategies 1, 2 and 3 AUD/VKT | After implementing strategies 1, 2, 3 and 4 AUD/VKT |
|----------------------------------------|-----------------------------------------|----------------------------------------|------------------------------------------------|--------------------------------------------------|-----------------------------------------------------|
| Cost of E 55 (A)                       | 1.00E-01                                | 9.00E-02                               | 9.00E-02                                       | 9.00E-02                                         | 8.00E-02                                            |
| Additional vehicle cost (B)            | 0.00E+00                                | 0.00E+00                               | 0.00E+00                                       | 0.00E+00                                         | 0.00E+00                                            |
| Total life cycle cost (C=A+B)          | 1.00E-01                                | 9.00E-02                               | 9.00E-02                                       | 9.00E-02                                         | 8.00E-02                                            |
| Total cost for gasoline (D)            | 8.13E-02                                | 8.13E-02                               | 8.13E-02                                       | 8.13E-02                                         | 8.13E-02                                            |
| Reduction compared to gasoline [(D-C)] | -2.00E-02                               | -1.00E-02                              | -1.00E-02                                      | -1.00E-02                                        | 0.00E+00                                            |

7. Economic strategies for hydrogen fuel in regard to LCC indicator

Strategies for Fuel

- Strategy 1: With the soft loan scheme and 10% capital subsidy
- Strategy 2: Removal of GST on hydrogen purchase
- Strategy 3: Utilization of product oxygen
- Strategy 4: hydrogen production plant received electricity at a rate of 8.3 cents/kWh through power purchase agreements (PPAs)

| Item                          | Before implementing strategies, AUD/VKT | After implementing strategy 1, AUD/VKT | After implementing strategy 1 and 2, AUD/VKT | After implementing strategy 1, 2 and 3, AUD/VKT | After implementing strategy 1, 2 and 3 and 4, AUD/VKT |
|-------------------------------|-----------------------------------------|----------------------------------------|----------------------------------------------|-------------------------------------------------|-------------------------------------------------------|
| Cost of hydrogen fuel (A)     | 3.07E-01                                | 3.03E-01                               | 2.76E-01                                     | 2.64E-01                                        | 8.13E-02                                              |
| Additional vehicle cost (B)   | 4.81E-01                                | 4.81E-01                               | 4.81E-01                                     | 4.81E-01                                        | 4.81E-01                                              |
| Total life cycle cost (C=A+B) | 7.87E-01                                | 7.84E-01                               | 7.56E-01                                     | 7.44E-01                                        | 5.62E-01                                              |

|                                        |           |           |           |           |           |
|----------------------------------------|-----------|-----------|-----------|-----------|-----------|
| Total cost for gasoline (D)            | 8.13E-02  | 8.13E-02  | 8.13E-02  | 8.13E-02  | 8.13E-02  |
| Reduction compared to gasoline [(D-C)] | -7.06E-01 | -7.03E-01 | -6.75E-01 | -6.63E-01 | -4.81E-01 |

#### 8. Economic strategies for PHEV in regard to LCC indicator

Strategies for Fuel: No economic strategies for fuel but fuel cost changes due to environmental strategies (i.e.: 6.6% mileage from solar PV)

#### Alternative fuel Vehicle

- Strategy V1: Removal of GST on vehicle purchase
- Strategy V2: Fifty percent subsidy on vehicle registration
- Strategy V3: Inclusion of import duty on gasoline
- Strategy V4: direct subsidy and/or with the tax benefits

| Item                                         | Before implementing strategies, AUD/VKT | After implementing fuel strategies, AUD/VKT | After implementing both fuel and vehicle strategy V1, AUD/VKT | After implementing both fuel and vehicle strategies V1 and V2, AUD/VKT | After implementing both fuel and vehicle strategies V1, V2 and V3, AUD/VKT | After implementing both fuel and vehicle strategies V1, V2, V3 and V4 AUD/VKT |
|----------------------------------------------|-----------------------------------------|---------------------------------------------|---------------------------------------------------------------|------------------------------------------------------------------------|----------------------------------------------------------------------------|-------------------------------------------------------------------------------|
| Cost of liquid fuel (base case gasoline) (A) | 3.00E-02                                | 2.60E-02                                    | 2.60E-02                                                      | 2.60E-02                                                               | 2.60E-02                                                                   | 2.60E-02                                                                      |
| Cost of electricity (B)                      | 1.30E-02                                | 1.30E-02                                    | 1.30E-02                                                      | 1.30E-02                                                               | 1.30E-02                                                                   | 1.30E-02                                                                      |
| Additional vehicle cost (C)                  | 1.65E-01                                | 1.65E-01                                    | 9.90E-02                                                      | 6.60E-02                                                               | 5.50E-02                                                                   | 4.10E-02                                                                      |
| Total life cycle cost (D=A+B+C)              | 2.08E-01                                | 2.04E-01                                    | 1.38E-01                                                      | 1.05E-01                                                               | 9.40E-02                                                                   | 8.00E-02                                                                      |
| Total cost for gasoline (E)                  | 8.13E-02                                | 8.13E-02                                    | 8.13E-02                                                      | 8.13E-02                                                               | 8.13E-02                                                                   | 8.13E-02                                                                      |
| Reduction compared to gasoline [(E-D)]       | -8.90E-02                               | -8.70E-02                                   | -5.50E-02                                                     | -1.90E-02                                                              | -1.00E-02                                                                  | 0.00E+00                                                                      |

## Reference:

1. Wilkinson, I. *Western Australian wheat industry* (2018). Available from: <https://www.agric.wa.gov.au/grains-research-development/western-australian-wheat-industry> (accessed on 1 Jnaury 2018).
2. Hoque N.; Biswas, W.; Mazhar, I.; Howard, I. Environmental Life Cycle Assessment of Alternative Fuels for Western Australia's Transport Sector. *Atmosphere* **2019**, *10*, 398.
3. Muñoz, I.; Flury, K.; Jungbluth, N.; Rigarlsford, G.; i Canals, LM; King, H. Life cycle assessment of bio-based ethanol produced from different agricultural feedstocks. *The International Journal of Life Cycle Assessment*, **2014**, *19*(1), 109-119.
4. Department of the Environment and Energy, Australian Petroleum Statistics. Commonwealth of Australia: Canberra, Australia, 2017.
5. O'Connell, D.; Batten, D.; O'Connor, M. H.; May, B.; Raison, R. J.; Keating, B. A.; Beer, T.; Braid, A.L.; Haritos, V.; Begley, C. Biofuels in Australia: Issues and Prospects: A Report for the Rural Industries Research and Development Corporation. Rural Industries Research and Development Corporation: Canberra, Australia, 2007.
6. Mu, D.; Seager, T.; Rao, P.S.; Zhao, Fu. Comparative life cycle assessment of lignocellulosic ethanol production: biochemical versus thermochemical conversion. *Environmental management*, **2010**, *46*(4), 565-578.
7. John, B.; Amir, A. The economics of the industry: future drivers and barriers to the bioenergy and mallee industries. Available from: <https://www.oilmallee.org.au/media-centre.html> (accessed on 10 May 2019).
8. AgriFutures Australia. Farm Diversity. 2017; Available from: [http://www.agrifutures.com.au/publications-resources/farm-diversity-search/?fwf\\_farm\\_diversity\\_option=both&fwf\\_per\\_page=72](http://www.agrifutures.com.au/publications-resources/farm-diversity-search/?fwf_farm_diversity_option=both&fwf_per_page=72) (accessed on 02 January 2018).
9. AECOM Australia, Efficient Costs of New Entrant Ethanol Producers. AECOM Australia: Perth, Western Australia, 2016.
10. Farine, D.R.; O'Connell, D. A.; John-Raison, R.; May, B.M.; O'Connor, M.H.; Crawford, D.F.; Herr, A.; Taylor, J.A.; Jovanovic, T.; Campbell, P.K. An assessment of biomass for bioelectricity and biofuel, and for greenhouse gas emission reduction in Australia. *GCB Bioenergy*, **2012**, *4*(2), 148-175.
11. Department of Primary Industries and Regional Development. *Biomass and bioenergy* (2018), Available from: <https://www.agric.wa.gov.au/climate-land-water/biomass-and-bioenergy> (accessed on 23 November 2019).
12. Department of Finance Public Utilities Office, Strategic Energy Initiative Energy 2031: Building the Pathways for Western Australia's Energy Future. Government of Western Australia: Perth, Western Australia, 2012.
13. Western Australian Planning Commission, State Planning Strategy 2050, Western Australian Planning Commission, Government of Western Australia: William Street, Perth, Western Australia, 2014.
14. Synergy, Standard Electricity Prices and Charges. Synergy: Perth, Western Australia, 2019.
15. Climate Works, The state of electric vehicles in Australia. Electric Vehcile council: Melbourne, Australia, 2017.
16. Government of Western Australia, Western Australian Renewable Hydrogen Strategy. Government of Western Australia: Perth, WA, 2019.
17. Brooksbank, K.; Lever, M.; Paterson, H.; Weybury, M. Biomass Scoping Study: Opportunities for Agriculture in Western Australia. Department of Agriculture and Food:Perth, Western Australia, Australia, 2014.
18. Pickin, J.; Randell, P. Australian National Waste Report 2016. Department of the Environment and Energy: Canberra, Australia, 2017.
19. AEMO, Gas Statement of Opportunities for Western Australia. Australian Energy Market Operator Limited: Melbourne, Australia, 2017.
20. Department of Mines Industry Regulation and safety. Natural Gas-LNG (2018). Available from: <http://www.dmp.wa.gov.au/Investors/Natural-gas-LNG-1475.aspxn> (accessed on 18 November 2019).
21. Raslavičius, L.; Keršys, A.; Mockus, S.; Keršienė, N.; Starevičius, M.; Liquefied petroleum gas (LPG) as a medium-term option in the transition to sustainable fuels and transport. *Renewable and Sustainable Energy Reviews*, **2014**, *32*, 513-525.
22. Cohan, D.S. and S. Sengupta, Net greenhouse gas emissions savings from natural gas substitutions in vehicles, furnaces, and power plants. *International Journal of Global Warming*, **2016**, *9*(2), 254-273.

23. Han, E. LPG-conversions-myths-autogas: LPG Gas Blog (2018). Available from: <https://www.elgas.com.au/blog/690-7-lpg-conversions-myths-autogas> (accessed on [cited 19 October 2018]).
24. Hepburn, S. Australia's fuel stockpile is perilously low, so why aren't we stocking up? (2018). Available from: <https://www.abc.net.au/news/2018-05-09/australias-liquid-fuel-stockpile-perilously-low-energy-security/9742340> (accessed on 10 May 2019).
25. Rutovitz, J., E. Dominish, and J. Downes, Calculating global energy sector jobs: 2015 methodology. Institute for Sustainable Futures: Sydney, Australia, 2015.
26. Lawania, K.K. and W.K. Biswas, Cost-effective GHG mitigation strategies for Western Australia's housing sector: a life cycle management approach. *Clean Technologies and Environmental Policy*, **2016**, 18(8), 2419-2428.
27. Homer Pro. Real discount rate (2018). Available from: [https://www.homerenergy.com/products/pro/docs/latest/real\\_discount\\_rate.html](https://www.homerenergy.com/products/pro/docs/latest/real_discount_rate.html) (accessed on 12 February 2020).
28. Wu, H.; Fu, Q.; Giles, R.; Bartle, J. Production of mallee biomass in Western Australia: energy balance analysis. *Energy Fuels* **2007**, 22, 190–198.
29. Weldegiorgis, F.S. and D.M. Franks, Social dimensions of energy supply alternatives in steelmaking: comparison of biomass and coal production scenarios in Australia. *Journal of Cleaner Production*, **2014**, **84**, 281-288.
30. Biswas, W.K.; Barton, L.; Carter, D. Global warming potential of wheat production in Western Australia: a life cycle assessment. *Water and Environment Journal*, 2008, 22(3), 206-216.
31. Dr. Shahab Pathan (Department of Primary Industries and Regional Development, Perth, Western Australia), Personal Communication 2018.
32. Stucley, C.; Schuck, S.; Sims, R.; Bland, J.; Marino, B.; Borowitzka, M.; Abadi, A.; Bartle, J.; Giles, R.; Thomas, Q. Bioenergy in Australia: Status and Opportunities. Bioenergy Australia: New South Wales, Australia, 2012.
33. Brooke, G.; McMaster, C. Weed control in winter crops 2018. Department of Primary Industries: NSW, Australia, 2018.
34. Elders Australia, Elders Technical Site Results. Elders Australia: Adelaide, Australia, 2016.
35. Fuel Watch Western Australia. Fuel Watch Historical Price Search (2020). Available from: <https://www.fuelwatch.wa.gov.au/fuelwatch/pages/public/historicalPriceSearch.aspx> (accessed on 13 February 2020[;]).
36. Steen, M.; Lebedeva, N.; Di-Persio, F.; Boon-Brett, L. EU competitiveness in advanced Li-ion batteries for E-mobility and stationary storage applications—opportunities and actions. European Union: Luxembourg, Germany, 2017.
37. Rustandi, F.; Wu, H. Biodiesel production from canola in Western Australia: Energy and carbon footprints and land, water, and labour requirements. *Ind. Eng. Chem. Res.* **2010**, **49**, 11785–11796.
